# Supplementary material for: Preliminary study of the UL55 gene based on infectious Chinese virulent duck enteritis virus bacterial artificial chromosome clone
Source: PubMed Central journal article supplement (PMC5390382; doi:10.1186/s12985-017-0748-y), 2017-04-13

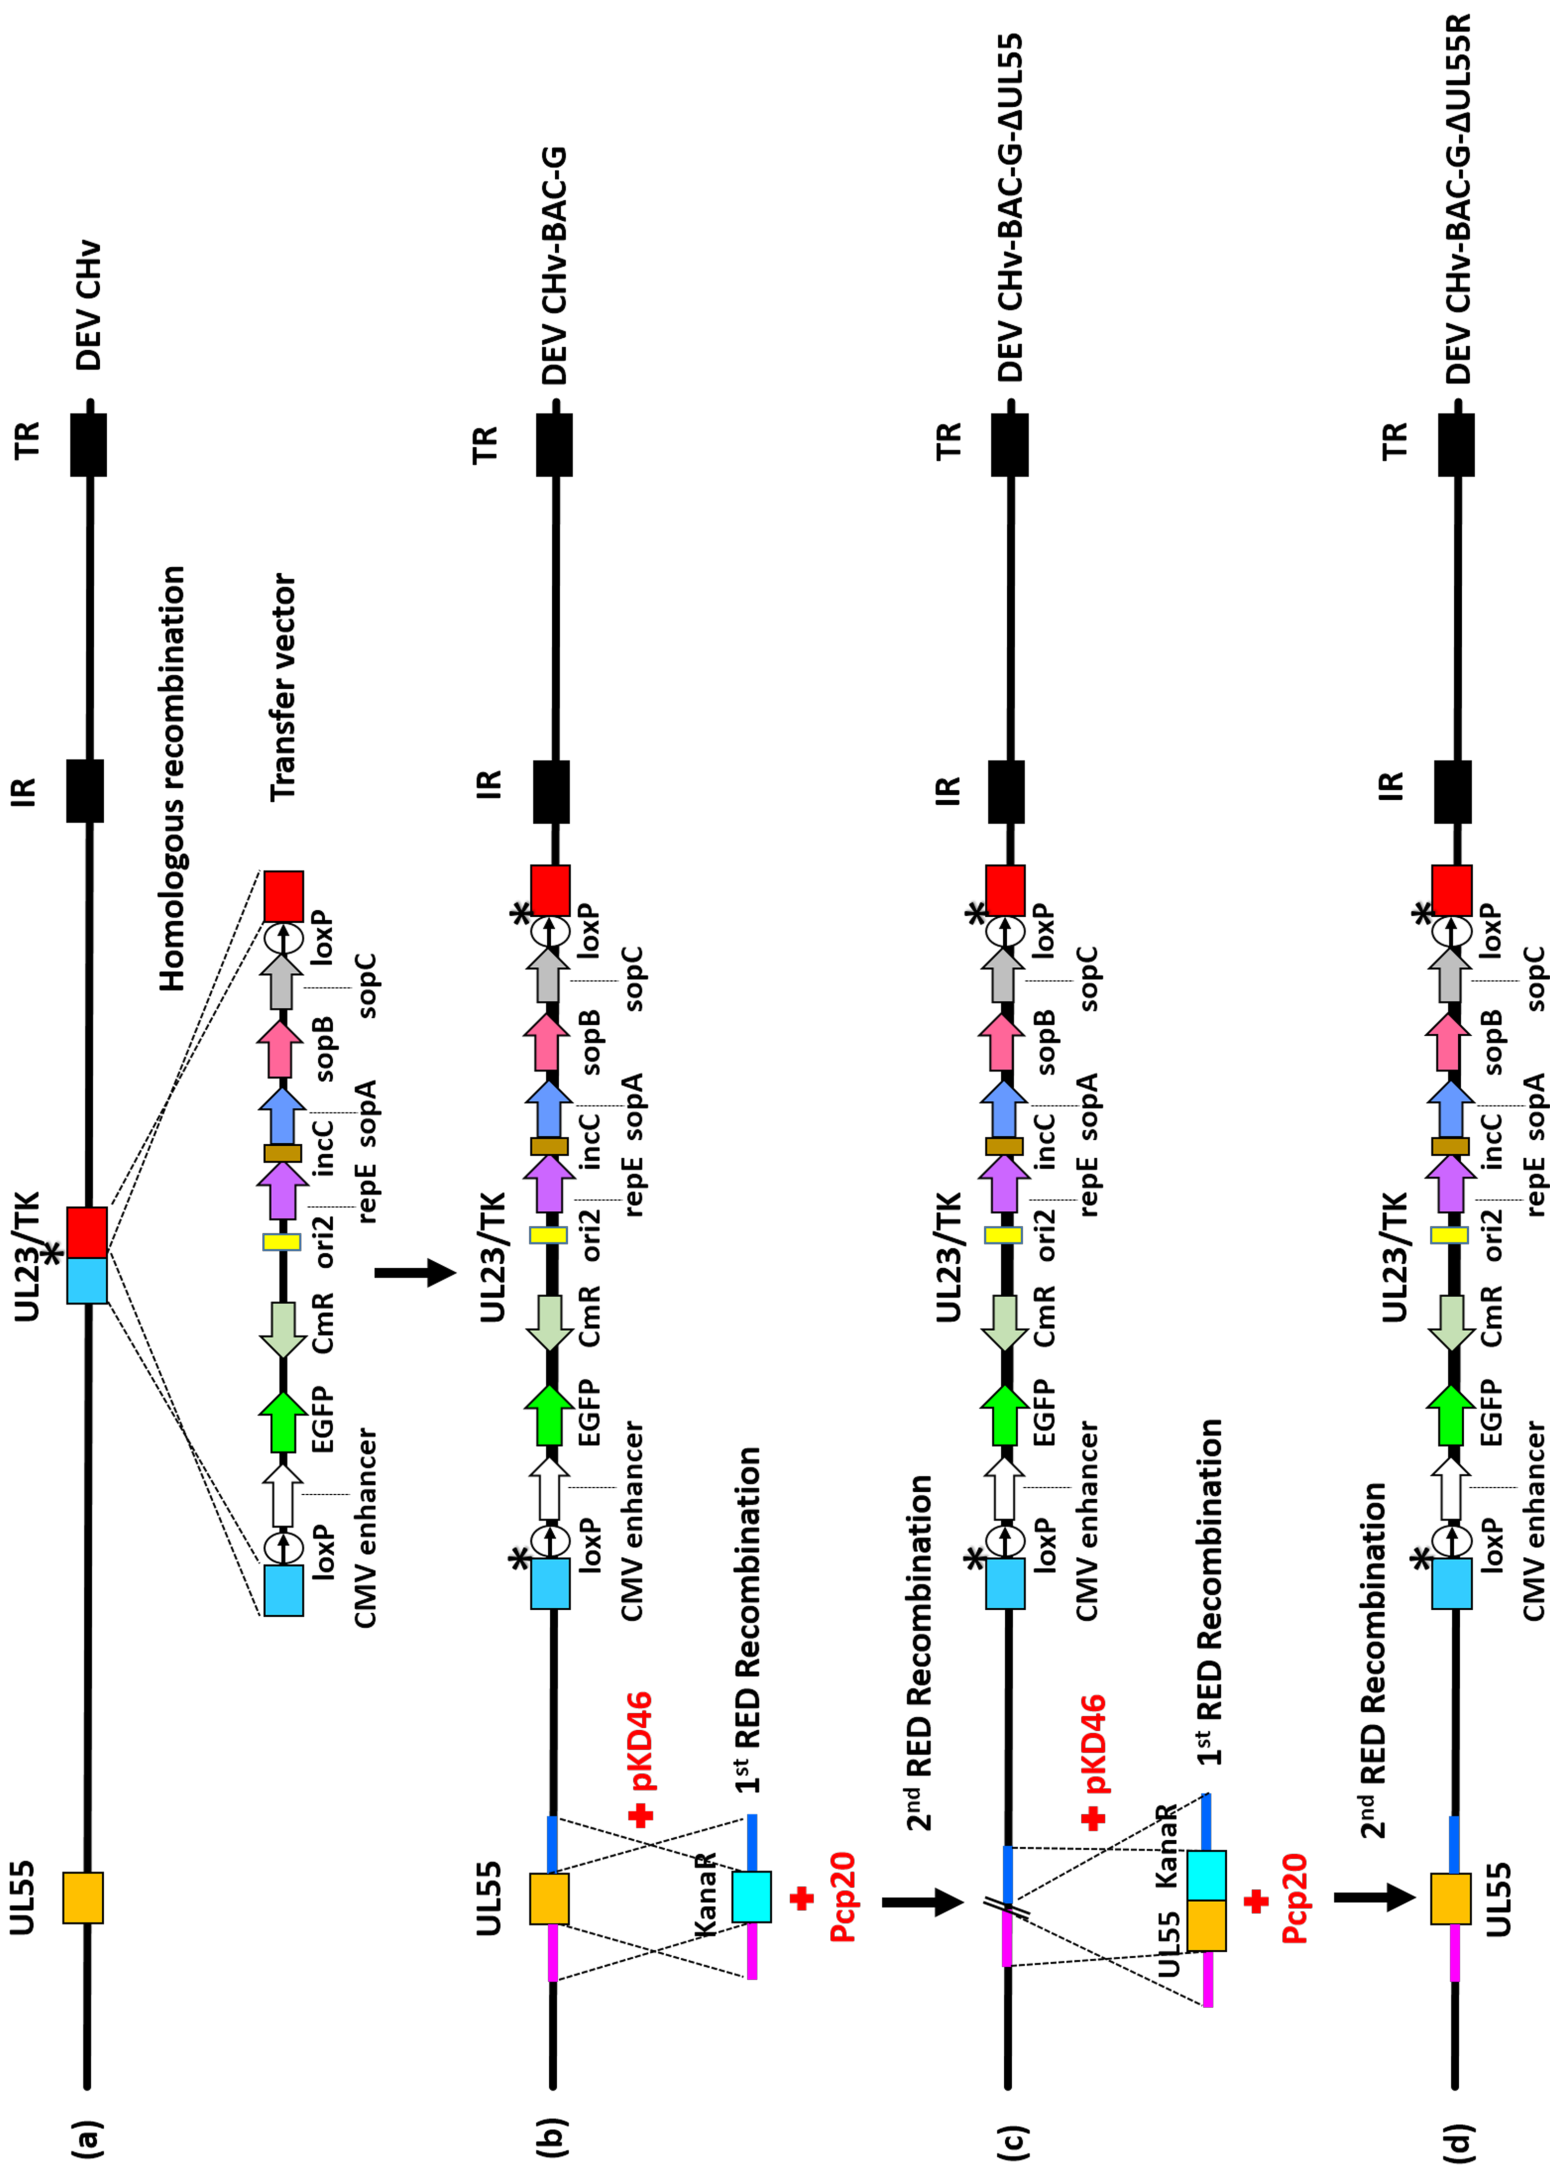

Supplement: 12985_2017_748_MOESM2_ESM.pdf [file 12985_2017_748_MOESM2_ESM.pdf]
